# Supplementary material for: Paraoxonase 1 knockout rats have impaired T cell development at the CD4/CD8 double-negative to double-positive transition stage
Source: PubMed Central journal article supplement (PMC6160460; doi:10.1038/s41598-018-32780-w), 2018-09-27
Supplement: 41598_2018_32780_MOESM1_ESM.pdf [file 41598_2018_32780_MOESM1_ESM.pdf]

**Paraoxonase 1 knockout rats have impaired T cell development at the CD4/CD8  
double-negative to double-positive transition stage**

**Lin bai<sup>1</sup>, Guiying Shi<sup>1</sup>, Yuanwu Ma<sup>1</sup>, Li Zhang<sup>1</sup>, Feifei Guan<sup>1</sup>, Xu Zhang<sup>1</sup>, Yanfeng Xu<sup>1</sup>,  
Houzao Chen<sup>2</sup> and Lianfeng Zhang<sup>1\*</sup>**

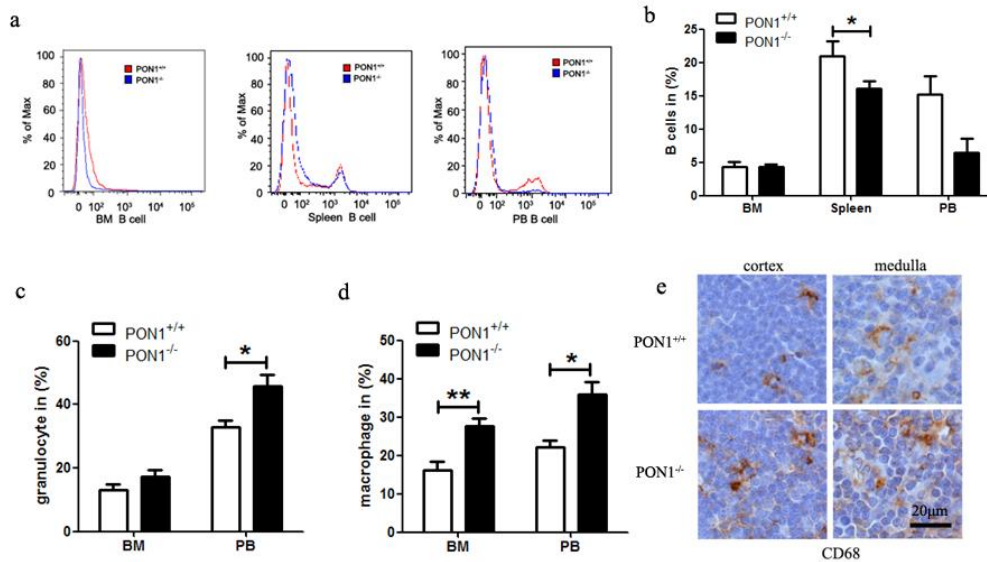

**Figure S1.** **a** Representative histograms of B cells in the bone marrow (BM), spleen, and peripheral blood (PB) from  $PON1^{-/-}$  and  $PON1^{+/+}$  rats aged 2 months. **b** Flow cytometric analysis of the percentage of B cells in the BM, spleen, and PB of  $PON1^{-/-}$  and  $PON1^{+/+}$  rats aged 2 months. **c**, **d** Flow cytometric analysis of the percentages of granulocytes and macrophages in the BM and peripheral PB from  $PON1^{-/-}$  and  $PON1^{+/+}$  rats aged 2 months. **e** Immunohistochemical analysis of CD68+ cells in the cortex and medulla of the thymus from  $PON1^{-/-}$  and  $PON1^{+/+}$  rats aged 2 months. Scale bar = 20  $\mu$ m. Data represent the mean  $\pm$  SD of three independent experiments ( $n = 5$  per group). \* $P < 0.05$ ; \*\* $P < 0.01$ .

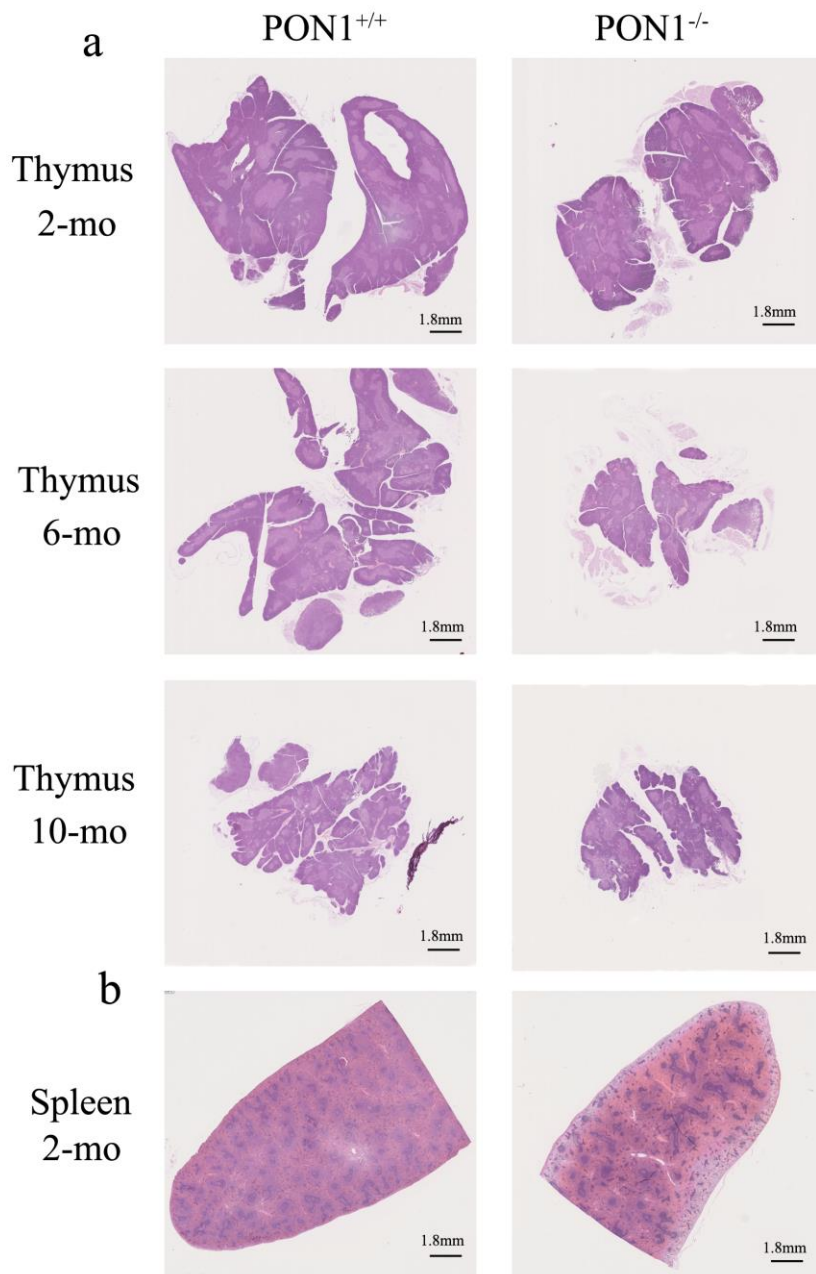

**Figure S2. a** Histopathological analyses of whole-mounts of thymus sections from PON1<sup>+/+</sup> and PON1<sup>-/-</sup> rats aged 2, 6 and 10 months. **b** Histopathological analyses of whole-mounts of spleen sections from PON1<sup>+/+</sup> and PON1<sup>-/-</sup> rats aged 2 months. Scale bar = 1.8 mm.
